# Supplementary material for: Performance of a multi-tubular Fischer–Tropsch reactor with two catalytic zones of different intrinsic chemical activity
Source: Royal Society of Chemistry journal article supplement (doi:10.1039/d2cy01804g), 2022-12-01
Supplement: d2cy01804g1.pdf [file d2cy01804g1.pdf]

## Supporting Information

**Tab. S1:** Characteristic temperatures and CO conversion of a cooled multi-tubular fixed bed FT reactor for a uniform axial activity ( $C_a$ ). Assumptions: 1)  $T_{max,ax} < 240^\circ\text{C}$  to avoid excessive methane formation; 2)  $T_{cool,max} = T_{cool,ignition} - 5\text{ K}$  to ensure thermal stability of reactor; 3)  $C_a < 4$ , corresponding to a realistic value of the max. Co content of 40 wt.-%.

| $C_a$                   | $X_{CO}^a$<br>in % | $T_{cool}$<br>in °C | $T_{ig}$<br>in °C | $T_{max,ax}$<br>in °C | $r_{m,eff,CO}$ ( $\eta_{pore}$ in %) at $T_{max,ax}$ for<br>$X_{CO} = 0$ in $\text{mol}_{CO} \text{kg}_{cat}^{-1} \text{s}^{-1}$ |
|-------------------------|--------------------|---------------------|-------------------|-----------------------|----------------------------------------------------------------------------------------------------------------------------------|
| 0.25                    | 21.2               | 231.0               | 249.0             | 240.0                 | 0.00262 (70%)                                                                                                                    |
| 0.5                     | 29.8               | 226.1               | 237.7             | 240.0                 | 0.00417 (55%)                                                                                                                    |
| 1                       | 38.4               | 220.1               | 226.6             | 240.0                 | 0.00621 (42%)                                                                                                                    |
| 1.125                   | 39.8               | 219.0               | 224.8             | 240.0                 | 0.00662 (39%)                                                                                                                    |
| <b>1.25 (best case)</b> | <b>40.9</b>        | <b>218.0</b>        | <b>223.1</b>      | <b>240.0</b>          | <b>0.00700 (37%)</b>                                                                                                             |
| 1.5                     | 40.6               | 215.3               | 220.3             | 237.1                 | 0.00696 (38%)                                                                                                                    |
| 2                       | 39.8               | 211.0               | 216.0             | 232.2                 | 0.00679 (39%)                                                                                                                    |
| 3                       | 38.5               | 205.0               | 210.0             | 225.1                 | 0.00645 (41%)                                                                                                                    |
| 4                       | 37.4               | 200.8               | 205.8             | 220.1                 | 0.00621 (43%)                                                                                                                    |

<sup>a</sup> It may be interesting to know  $X_{CO}$  reached at the maximum axial temperature ( $z \approx$  about 2 m, see Fig.3): 4% ( $C_a = 0.25$ ), 5% for  $C_a = 0.5$ , 8% ( $C_a = 1.25$ ), 8% ( $C_a = 1.5$ ), and 1% ( $C_a = 3$  and 4).

A good approximation for the maximum temperature difference between the maximum axial temperature and the cooling temperature to avoid a temperature runaway of a cooled fixed bed reactor is given by:<sup>1</sup>

$$\Delta T_{max} = T_{max,ax}^* - T_{max,cool} = \frac{R T_{max,ax}^* T_{max,cool}}{E_{A,eff}} \quad (\text{S1})$$

The temperatures  $T_{max,ax}^*$  and  $T_{max,cool}$  are the highest values of the axial temperature (center of bed) and the cooling temperature, respectively, to avoid a thermal runaway.

The effective activation energy  $E_{A,eff}$  valid for the axial position, where  $T_{max,ax}$  is just reached, is calculated based on the mean radial temperature  $T_{mean} = 0.5 (T_{max,ax} - T_{cool})$  by:

$$E_{A,eff} = \frac{R \ln\left(\frac{r_{CO,eff,T_{mean}}}{r_{CO,eff,T_{mean} + 1K}}\right)}{\left[\frac{1}{(T_{mean} + 1K)} - \frac{1}{T_{mean}}\right]} \quad (\text{S2})$$

Tab. S2 shows the values of  $\Delta T_{max}$  calculated by the reactor model and by the approximation based on Eq. (S1) and Eq. (S2). The deviation of only about 2 K is small, and hence, the agreement is quite well, which is also a good proof, that the calculations by the reactor model are reliable.

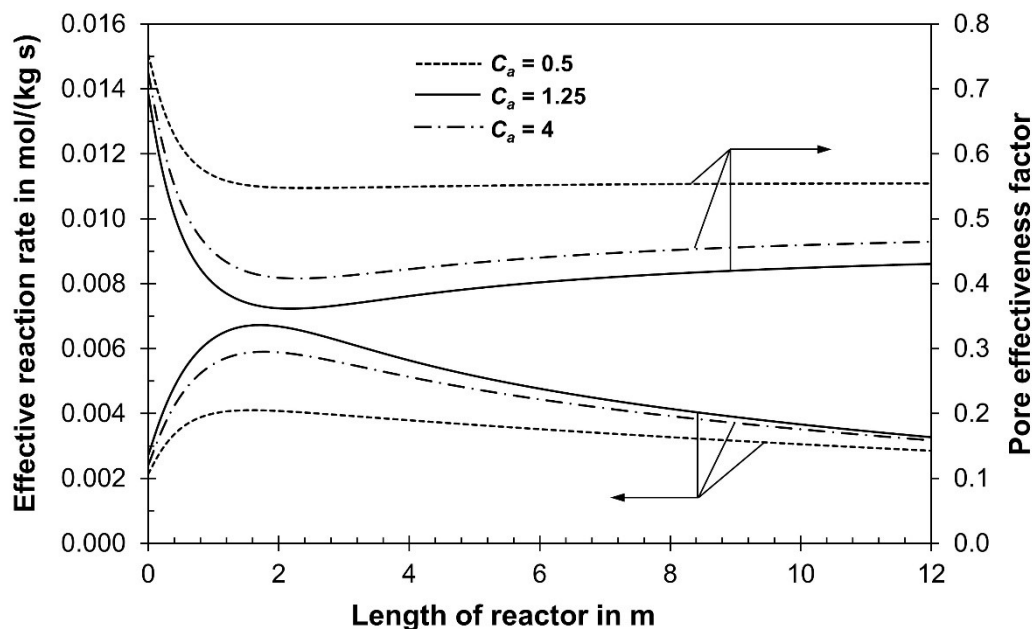

**Fig. S1:** Axial profiles of effective rate of conversion of CO and pore effectiveness factor in a cooled fixed bed FT reactor for three different but uniform axial activities (value of  $C_a$ ) (conditions/assumptions see Fig. 3 - 5).

**Tab. S2:** Temperature difference between highest axial temperature (center of tube) and cooling temperature: Comparison of selected modelled values and estimations based on equations (S1) and (S2). Case of cooled fixed bed FT reactor for different but uniform axial activities (value of  $C_a$ ) (conditions/assumptions see Figs. 3 to 5).

| $C_a$                                                                               | Values of reactor model |                         |                     |                                   | Calculations by Eq. (S1) and Eq. (S2) |                                                              |
|-------------------------------------------------------------------------------------|-------------------------|-------------------------|---------------------|-----------------------------------|---------------------------------------|--------------------------------------------------------------|
|                                                                                     | $T_{max,ax}^*$<br>in °C | $T_{max,cool}$<br>in °C | $T_{mean}$<br>in °C | $T_{max,ax}^* - T_{cool}$<br>in K | $E_{a,eff}(T_{mean})$<br>in kJ/mol    | $\Delta T_{max} = R T_{max,ax} T_{cool} / E_{a,eff}$<br>in K |
| <b>Cases for <math>T_{cool,max} = T_{ig} - 5</math> K (only limited by runaway)</b> |                         |                         |                     |                                   |                                       |                                                              |
| 0.25                                                                                | 265.5                   | 244.3                   | 257.4               | 26.1                              | 82                                    | 28.5                                                         |
| 0.5                                                                                 | 257.7                   | 232.7                   | 245.2               | 25.0                              | 84                                    | 26.6                                                         |
| 1                                                                                   | 244.6                   | 221.6                   | 233.1               | 23.0                              | 87                                    | 24.5                                                         |
| 1.5                                                                                 | 237.1                   | 215.3                   | 226.2               | 21.8                              | 89                                    | 23.3                                                         |
| 2                                                                                   | 232.2                   | 211.0                   | 221.6               | 21.1                              | 90                                    | 22.6                                                         |
| 3                                                                                   | 225.1                   | 205.0                   | 215.1               | 19.3                              | 92                                    | 21.5                                                         |

|   |       |       |       |      |    |      |
|---|-------|-------|-------|------|----|------|
| 4 | 220.1 | 200.8 | 210.5 | 18.9 | 94 | 20.7 |
|---|-------|-------|-------|------|----|------|

**Tab. S3:** Characteristic temperatures and CO conversion of a two-zone FT reactor for different activities in both zones but constant mean activity of  $C_{a,mean} = 1.25 = 0.5 (C_{a,1} + C_{a,2})$ . Assumptions: 1)  $T_{max,ax} < 240^\circ\text{C}$  to avoid excessive formation of  $\text{CH}_4$ ; 2)  $T_{cool,max} = T_{cool, ignition} - 5 \text{ K}$  to ensure thermal stability of reactor.

| Activity in zone 1 ( $z < 6 \text{ m}$ )<br>and zone 2 ( $6 \text{ m} < z < 12 \text{ m}$ ) |              | $X_{\text{CO}}$<br>in % | $T_{\text{cool}}$<br>in $^\circ\text{C}$ | $T_{\text{ig}}$<br>in $^\circ\text{C}$ | $T_{\text{max},ax,1}$<br>in $^\circ\text{C}$ | $T_{\text{max},ax,2}$<br>in $^\circ\text{C}$ |
|---------------------------------------------------------------------------------------------|--------------|-------------------------|------------------------------------------|----------------------------------------|----------------------------------------------|----------------------------------------------|
| $C_{a,1}$                                                                                   | $C_{a,2}$    |                         |                                          |                                        |                                              |                                              |
| 0.5                                                                                         | 2            | 30.4                    | 213.0                                    | 218.0                                  | 217.6                                        | 236.6                                        |
| 0.75                                                                                        | 1.75         | 36.5                    | 216.1                                    | 231.1                                  | 225.8                                        | 240.0                                        |
| 0.9                                                                                         | 1.6          | 39.7                    | 217.7                                    | 228.2                                  | 231.6                                        | 240.0                                        |
| 0.95                                                                                        | 1.55         | 40.8                    | 218.2                                    | 227.4                                  | 233.7                                        | 240.0                                        |
| 1                                                                                           | 1.5          | 42.1                    | 218.7                                    | 226.6                                  | 236.1                                        | 240.0                                        |
| 1.05                                                                                        | 1.45         | 43.6                    | 219.3                                    | 225.8                                  | 238.9                                        | 240.0                                        |
| <b>1.067 (best case)</b>                                                                    | <b>1.433</b> | <b>44.1</b>             | <b>219.5</b>                             | <b>225.5</b>                           | <b>240.0</b>                                 | <b>240.0</b>                                 |
| 1.1                                                                                         | 1.4          | 43.4                    | 219.2                                    | 225.1                                  | 240.0                                        | 238.5                                        |
| 1.175                                                                                       | 1.325        | 42.1                    | 219.3                                    | 224.1                                  | 240.0                                        | 236.0                                        |
| 1.25                                                                                        | 1.25         | 40.9                    | 218.0                                    | 223.1                                  | 240.0                                        | 234.6 <sup>a</sup>                           |
| 1.5                                                                                         | 1            | 35.4                    | 215.3                                    | 220.3                                  | 237.1                                        | 231.8                                        |

<sup>a</sup> In this case, there is no local maximum in axial temperature in the rear part of the bed. The given temperature is just the value reached at  $z = 6$ , i.e. at the entrance in zone 2.

**Tab. S4:** Characteristic temperatures and CO conversion of a cooled fixed bed two-zone FT reactor for different activities in the two zones of equal length (6 m). Assumptions: 1)  $T_{max,ax} < 240^{\circ}\text{C}$  to avoid excessive  $\text{CH}_4$  formation; 2)  $T_{cool,max} = T_{cool,ignition} - 5\text{ K}$  to ensure thermal stability of reactor; 3)  $C_a < 4$ , which corresponds to a realistic value of maximum Co content of about 40 wt.-%.

| Activity in zone 1 ( $z < 6\text{ m}$ )<br>and zone 2 ( $6\text{ m} < z < 12\text{ m}$ ) |           | Mean activity | $X_{\text{CO}}$<br>in % | $T_{\text{cool}}$<br>in $^{\circ}\text{C}$ | $T_{\text{cool,ig}}$<br>in $^{\circ}\text{C}$ | $T_{\text{max,ax,1}}$<br>in $^{\circ}\text{C}$ | $T_{\text{max,ax,2}}$<br>in $^{\circ}\text{C}$ |
|------------------------------------------------------------------------------------------|-----------|---------------|-------------------------|--------------------------------------------|-----------------------------------------------|------------------------------------------------|------------------------------------------------|
| $C_{a,1}$                                                                                | $C_{a,2}$ | $C_{a,mean}$  |                         |                                            |                                               |                                                |                                                |
| 0.5                                                                                      | 0.59      | 0.545         | 32.1                    | 226                                        | 237.7                                         | 239.9                                          | 240.0                                          |
| 0.75                                                                                     | 0.95      | 0.85          | 38.5                    | 222.6                                      | 231.1                                         | 239.8                                          | 240.0                                          |
| 1                                                                                        | 1.35      | 1.175         | 43.1                    | 220.0                                      | 226.6                                         | 239.7                                          | 239.9                                          |
| 1.25                                                                                     | 2.75      | 2             | 41.7                    | 211.7                                      | 216.7 <sup>a</sup>                            | 223.8                                          | 239.5                                          |
| 1.5                                                                                      | 2.2       | 1.85          | 47.5                    | 215.3                                      | 220.3                                         | 237.1                                          | 238.7                                          |
| 1.62                                                                                     | 2.38      | 2             | 47.2                    | 214.1                                      | 219.1                                         | 235.7                                          | 237.3                                          |
| 2                                                                                        | 3.45      | 2.725         | 50.4                    | 210.9                                      | 216.0                                         | 231.8                                          | 240                                            |
| 2                                                                                        | 4         | 3             | 47.8                    | 208.3                                      | 216.0                                         | 224.4                                          | 240.0                                          |
| 2.25                                                                                     | 4         | 3.125         | 51.2                    | 209.2                                      | 214.2                                         | 230.0                                          | 240                                            |
| <b>2.26 (best case)</b>                                                                  | <b>4</b>  | <b>3.13</b>   | <b>51.3</b>             | <b>209.2</b>                               | <b>214.2</b>                                  | <b>230.1</b>                                   | <b>240</b>                                     |
| 2.27                                                                                     | 4         | 3.135         | 51.0                    | 209.1                                      | 214.1                                         | 229.9                                          | 239.5                                          |
| 2.28                                                                                     | 4         | 3.14          | 50.7                    | 209.0                                      | 214.0                                         | 229.7                                          | 239.1                                          |
| 2.3                                                                                      | 4         | 3.15          | 50.7                    | 208.9                                      | 213.9                                         | 230.0                                          | 239.0                                          |
| 2.5                                                                                      | 4         | 3.25          | 48.1                    | 207.7                                      | 212.7                                         | 228.3                                          | 233.5                                          |
| 2.75                                                                                     | 4         | 3.375         | 45.6                    | 206.3                                      | 211.3                                         | 226.7                                          | 228.9                                          |
| 3.5                                                                                      | 4         | 3.75          | 40.2                    | 202.8                                      | 207.8                                         | 222.6                                          | 219.7                                          |
| 4                                                                                        | 4         | 4             | 37.4                    | 200.8                                      | 205.8                                         | 220.1                                          | 216.1                                          |

<sup>a</sup> In contrast to all other cases, here the ignition (thermal runaway) takes place in the second zone.

**Tab. S5:** Optimal distribution of activity in a two-zone FT reactor for different mean activities (each zone has a length of 6 m). Assumptions: 1)  $T_{max,ax} < 240^\circ\text{C}$  to avoid excessive  $\text{CH}_4$  formation; 2)  $T_{cool,max} = T_{cool, ignition} - 5 \text{ K}$  to ensure stability of reactor; 3)  $C_a < 4$ , which corresponds to a realistic value of maximum Co content of about 40 wt.-%.

| Optimal activity in zone 1 ( $z < 6$ m) and zone 2 ( $6 \text{ m} < z < 12$ m) |           | Mean activity | $X_{\text{CO}}$<br>in % | $T_{\text{cool}}$<br>in $^\circ\text{C}$ | $T_{\text{cool, ig}}$<br>in $^\circ\text{C}$ | $T_{\text{max,ax,1}}$<br>in $^\circ\text{C}$ | $T_{\text{max,ax,2}}$<br>in $^\circ\text{C}$ |
|--------------------------------------------------------------------------------|-----------|---------------|-------------------------|------------------------------------------|----------------------------------------------|----------------------------------------------|----------------------------------------------|
| $C_{a,1}$                                                                      | $C_{a,2}$ | $C_{a,mean}$  |                         |                                          |                                              |                                              |                                              |
| 0.465                                                                          | 0.535     | 0.5           | 30.9                    | 226.6                                    | 238.9                                        | 240.0                                        | 239.9                                        |
| 0.752                                                                          | 0.948     | 0.85          | 38.7                    | 222.7                                    | 231.0                                        | 240.0                                        | 240.0                                        |
| 1.067                                                                          | 1.433     | 1.25          | 44.1                    | 219.5                                    | 225.6                                        | 240.0                                        | 240.0                                        |
| 1.56                                                                           | 2.44      | 2             | 48.8                    | 214.7                                    | 219.7                                        | 236.4                                        | 240.0                                        |
| 2.26                                                                           | 4         | 3.13          | 51.3                    | 209.2                                    | 214.2                                        | 230.1                                        | 240.0                                        |
| 3                                                                              | 4         | 3.5           | 43.4                    | 205.0                                    | 210.0                                        | 225.1                                        | 225.1                                        |
| 4                                                                              | 4         | 4             | 37.4                    | 200.8                                    | 205.8                                        | 220.1                                        | 216.1                                        |

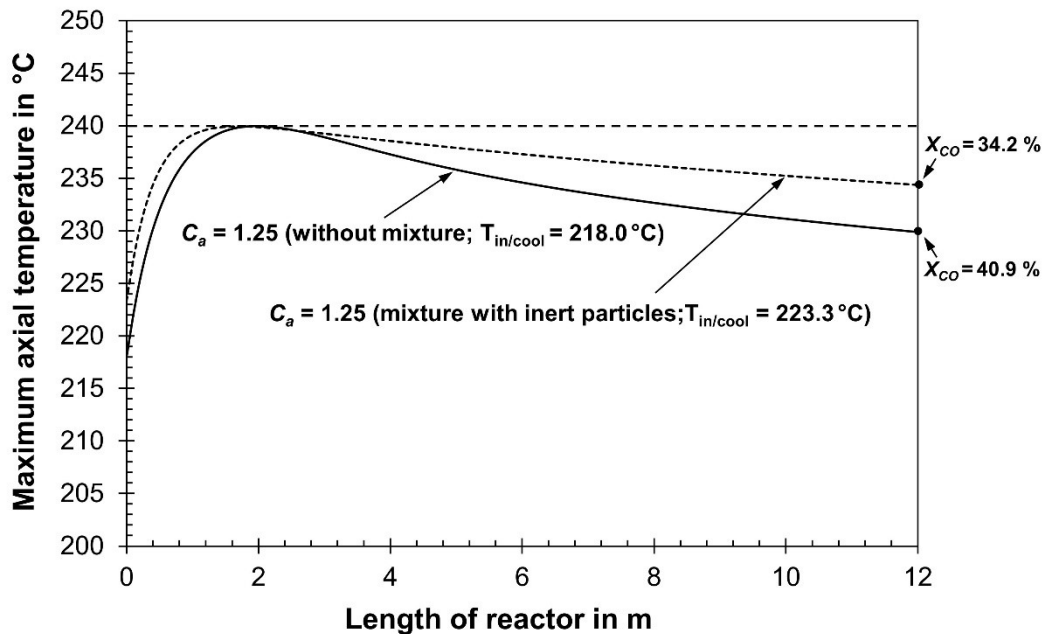

**Fig. S2:** Axial temperature profiles in the center of a single tube ( $r = 0$ ) of a cooled fixed bed FT reactor and CO conversion for a constant (mean) value of activity coefficient  $C_a$  of 1.25. Case 1:  $C_a = 1.25$  is realized by catalyst particles with  $C_a = 1.25$  without dilution with inert particles. Case 2:  $C_a = 1.25$  is realized by a 1-to-1 mixture of catalyst particles ( $C_a = 2.5$ ) with inert particles (same density,  $C_a = 0$ ). i.e.  $m_{cat} = m_{inert}$ . Other assumptions and conditions as given in Fig. 3.
